# Supplementary material for: Systematic screening for COVID‐19 associated invasive aspergillosis in ICU patients by culture and PCR on tracheal aspirate
Source: PubMed Central journal article supplement — Mycoses. 2021 Mar 5;64(6):641–50. doi: 10.1111/myc.13259 (PMC8014245; doi:10.1111/myc.13259), 2021-03-05
Supplement: MYC-64-641-s002.pdf [file MYC-64-641-s002.pdf]

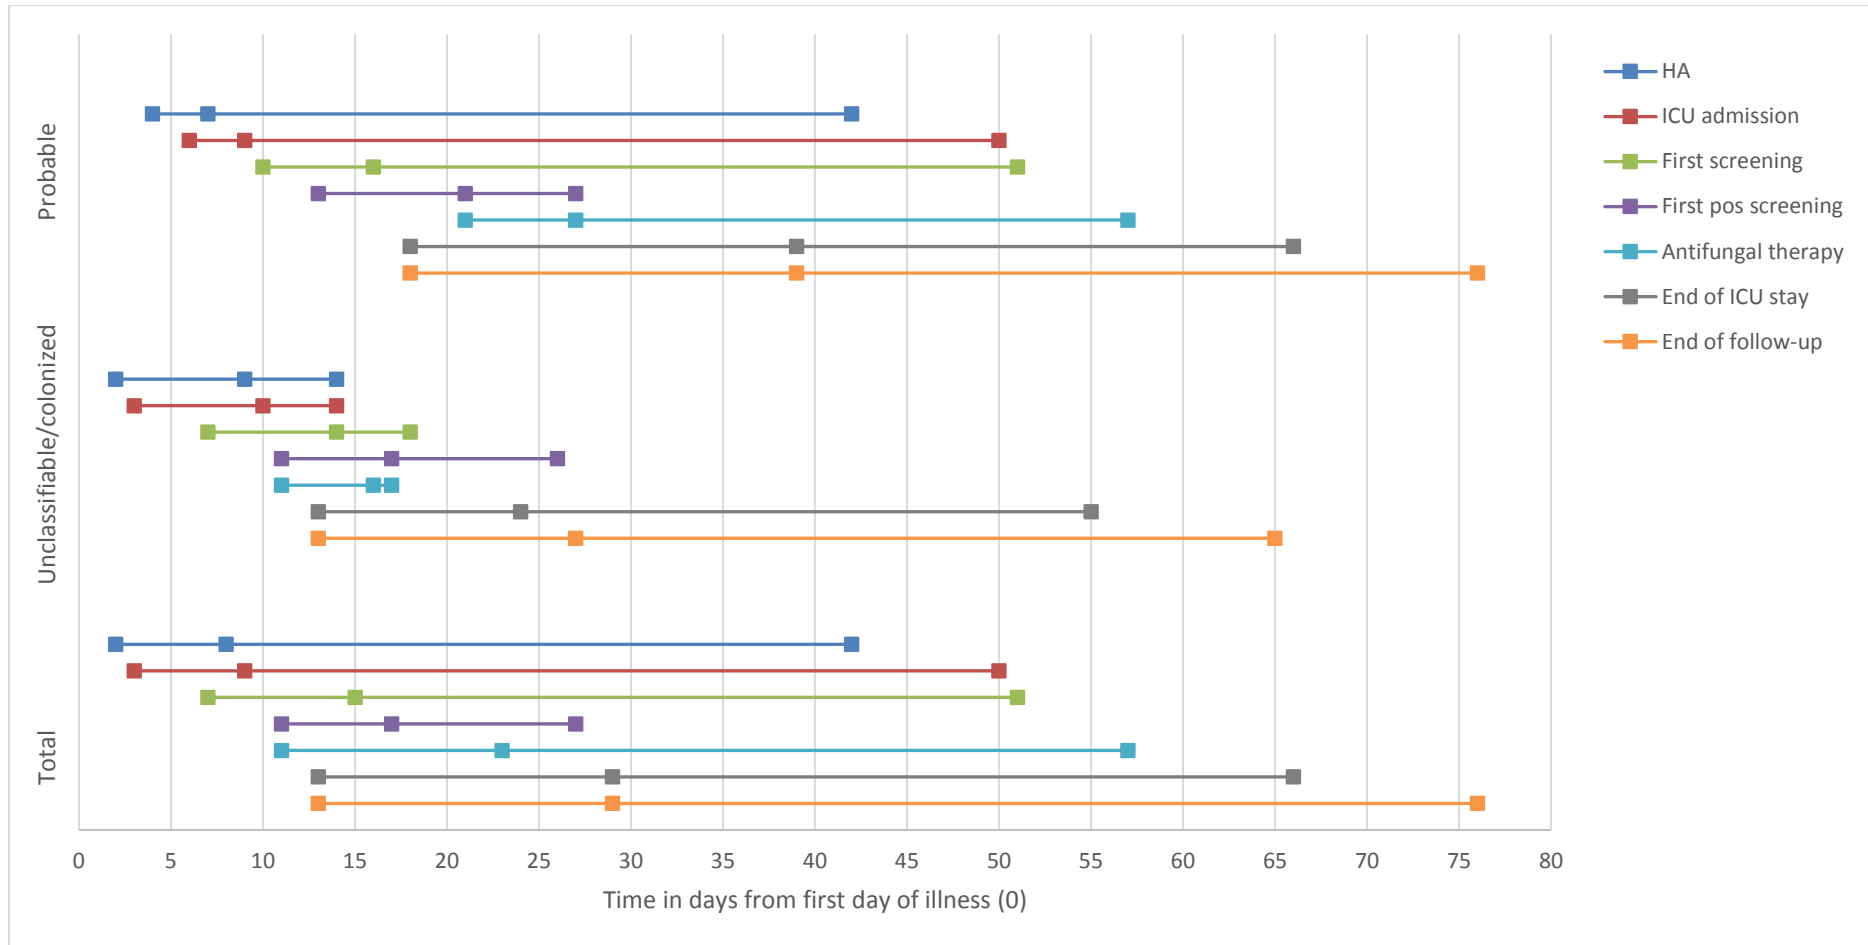

**Supplement Figure 1. Time to event (median and range) from first day of illness for different patient groups.**

Time to event (median and range) in days from first day of illness for patients with probable CAPA (n=11) and unclassifiable/colonized patients (n=8). The outer squares represent the range and the inner square represents the median.

Abbreviations: CAPA: COVID-19 associated pulmonary aspergillosis; HA: hospital admission; ICU: intensive care unit; pos: positive..

First screening: first day of *Aspergillus* screening, day of sample collection; first positive finding: first positive finding of *Aspergillus* in screening; day that PCR or culture was positive; antifungal therapy: initiation of treatment with an antifungal agent; follow-up: end of follow-up until discharge from hospital, transfer to another hospital or death.

For one of the patients with probable CAPA the first day of illness was unknown, so we calculated results from hospital admission for the variables first screening, first positive finding, antifungal therapy and end of follow-up from first day of illness.
